# Supplementary material for: Synthesis and structural characterisation of neutral pentacoordinate silicon(iv) complexes with a tridentate dianionic N,N,S chelate ligand
Source: Royal Society of Chemistry journal article supplement (doi:10.1039/c1dt11306b), 2011-12-21
Supplement: c1dt11306b.pdf [file c1dt11306b.pdf]

## Supporting Information for

# Synthesis and Structural Characterisation of Neutral Pentacoordinate Silicon(IV) Complexes with a Tridentate Dianionic *N,N,S* Chelate Ligand

Claudia Kobelt,<sup>a</sup> Christian Burschka,<sup>a</sup> Rüdiger Bertermann,<sup>a</sup> C. Fonseca Guerra,<sup>b</sup> F. Matthias Bickelhaupt,<sup>b</sup> and Reinhold Tacke <sup>\*a</sup>

### Contents

**Table S1.** Cartesian coordinates and ADF total energies of species **7**, **7a** und **7b** solvated in dichloromethane, computed at COSMO-BP86/TZ2P.

**Table S1.** Cartesian coordinates [ $\text{\AA}$ ] and ADF total energies [ $\text{kcal mol}^{-1}$ ] of species **7**, **7a** und **7b** solvated in dichloromethane, computed at COSMO-BP86/TZ2P.

---

**Species 7: (-4441.09 kcal mol<sup>-1</sup>, 0 imaginary frequencies)**

|    |           |           |           |
|----|-----------|-----------|-----------|
| C  | -0.277606 | -3.880588 | -2.085325 |
| C  | -1.126680 | -2.811911 | -1.829051 |
| C  | 1.045126  | -3.829391 | -1.629057 |
| C  | -0.628472 | -1.715279 | -1.125845 |
| C  | 2.601903  | 0.354256  | -0.923600 |
| C  | 1.470756  | -2.710343 | -0.935981 |
| C  | -1.425057 | -0.505830 | -0.769351 |
| C  | -2.536447 | 1.901935  | 0.221770  |
| C  | -1.179712 | 1.593855  | 0.418748  |
| C  | -3.076817 | 3.086984  | 0.734312  |
| C  | -0.371863 | 2.504991  | 1.141019  |
| C  | -2.275931 | 3.977850  | 1.450619  |
| C  | -0.923785 | 3.681950  | 1.653591  |
| H  | -0.638594 | -4.749770 | -2.632462 |
| H  | -2.162935 | -2.814992 | -2.162107 |
| H  | 1.736461  | -4.649391 | -1.807328 |
| H  | -1.838348 | -0.053940 | -1.686480 |
| H  | 2.249419  | 0.995374  | -1.746282 |
| H  | 3.026802  | -0.557906 | -1.359123 |
| H  | 2.481178  | -2.620768 | -0.546995 |
| H  | 3.391902  | 0.902746  | -0.394642 |
| H  | -3.180791 | 1.225493  | -0.335504 |
| H  | -2.285804 | -0.810125 | -0.149854 |
| H  | -4.130909 | 3.306512  | 0.567770  |
| H  | -2.695205 | 4.900309  | 1.850317  |
| H  | -0.287042 | 4.369921  | 2.209512  |
| N  | 0.641032  | -1.670513 | -0.696845 |
| N  | -0.567164 | 0.427642  | -0.059263 |
| Si | 1.151438  | 0.058670  | 0.244585  |
| S  | 1.321523  | 2.062936  | 1.331231  |
| Cl | 1.812062  | -1.130577 | 1.928782  |

**Species 7a: (-4432.77 kcal mol<sup>-1</sup>, 0 imaginary frequencies)**

|    |           |           |           |
|----|-----------|-----------|-----------|
| Si | -2.602385 | -0.481858 | 0.399956  |
| S  | -3.156813 | 1.463001  | -0.326805 |
| N  | -1.015682 | -0.496724 | -0.316740 |
| C  | -2.683333 | -0.750489 | 2.235449  |
| Cl | -3.786093 | -2.015952 | -0.446453 |
| C  | -0.730834 | 0.526174  | -1.227278 |
| C  | -1.694214 | 1.557462  | -1.355399 |
| C  | -1.502669 | 2.610646  | -2.248170 |
| C  | -0.340847 | 2.664195  | -3.025926 |
| C  | 0.616478  | 1.654703  | -2.906254 |
| C  | 0.427692  | 0.592251  | -2.018149 |
| C  | -0.077255 | -1.597991 | -0.105897 |
| C  | 1.153402  | -1.244567 | 0.718601  |
| C  | 2.410100  | -1.736331 | 0.348472  |
| C  | 3.512979  | -1.447808 | 1.150899  |
| C  | 3.323059  | -0.673574 | 2.294483  |
| C  | 2.032381  | -0.227424 | 2.583332  |
| N  | 0.960700  | -0.503416 | 1.822856  |
| H  | -2.362643 | -1.771488 | 2.484449  |
| H  | -2.025204 | -0.035757 | 2.745216  |
| H  | -3.715949 | -0.620849 | 2.586038  |
| H  | -2.259960 | 3.389388  | -2.331525 |
| H  | -0.190521 | 3.491102  | -3.718108 |
| H  | 1.524188  | 1.687722  | -3.507783 |
| H  | 1.188087  | -0.181875 | -1.937342 |
| H  | -0.615195 | -2.399822 | 0.420125  |
| H  | 0.235308  | -2.026154 | -1.069015 |
| H  | 4.502862  | -1.815553 | 0.883166  |
| H  | 4.153796  | -0.416458 | 2.950181  |
| H  | 1.847544  | 0.380161  | 3.471549  |
| H  | 2.520402  | -2.333698 | -0.556988 |

**Species 7b: (-4257.16 kcal mol<sup>-1</sup>, 0 imaginary frequencies)**

|    |           |           |           |
|----|-----------|-----------|-----------|
| Si | -1.222967 | -0.326265 | 0.402316  |
| S  | -1.816050 | 1.708134  | 0.154767  |
| N  | -0.306334 | -0.473347 | -1.064697 |
| C  | -2.580299 | -1.438342 | 0.991884  |
| C  | -0.355603 | 0.635706  | -1.931514 |
| C  | -1.046957 | 1.777735  | -1.467933 |
| C  | -1.140844 | 2.922684  | -2.258809 |
| C  | -0.535540 | 2.942225  | -3.518664 |
| C  | 0.159518  | 1.821133  | -3.978632 |
| C  | 0.247312  | 0.668884  | -3.194157 |
| C  | 0.911070  | -1.274021 | -0.938145 |
| C  | 1.226622  | -1.406097 | 0.534345  |
| C  | 2.372106  | -1.989874 | 1.060016  |
| C  | 2.533765  | -2.037290 | 2.441968  |
| C  | 1.537887  | -1.523947 | 3.280107  |
| C  | 0.403571  | -0.976878 | 2.713504  |
| N  | 0.267532  | -0.915747 | 1.364436  |
| H  | -1.678989 | 3.794731  | -1.890515 |
| H  | -0.610197 | 3.835727  | -4.136222 |
| H  | 0.629653  | 1.835093  | -4.960818 |
| H  | 0.771467  | -0.210259 | -3.566324 |
| H  | 0.804285  | -2.278182 | -1.375578 |
| H  | 1.748169  | -0.780769 | -1.449320 |
| H  | 3.434124  | -2.474881 | 2.868659  |
| H  | 1.636616  | -1.553746 | 4.361859  |
| H  | -0.416132 | -0.578416 | 3.305192  |
| H  | 3.127255  | -2.390206 | 0.387242  |
| H  | -3.446495 | -1.347917 | 0.323778  |
| H  | -2.896245 | -1.142307 | 2.002949  |
| H  | -2.244889 | -2.483811 | 1.022558  |

**Cl<sup>-</sup> (-157.69 kcal mol<sup>-1</sup>)**

|    |          |          |          |
|----|----------|----------|----------|
| Cl | 0.000000 | 0.000000 | 0.000000 |
|----|----------|----------|----------|

**Si(CH<sub>3</sub>)<sub>4</sub>**

|    |           |           |           |
|----|-----------|-----------|-----------|
| Si | 0.014222  | -0.000031 | 0.000017  |
| C  | 1.910408  | -0.000080 | 0.000051  |
| C  | -0.617825 | 1.787693  | -0.000087 |
| C  | -0.617881 | -0.893626 | 1.548346  |
| C  | -0.617481 | -0.893926 | -1.548336 |
| H  | 2.306769  | -1.027390 | -0.003224 |
| H  | 2.306724  | 0.516294  | -0.888053 |
| H  | 2.306726  | 0.510781  | 0.891336  |
| H  | -1.718540 | -0.907529 | 1.576321  |
| H  | -0.267375 | -1.937118 | 1.574741  |
| H  | -0.264101 | -0.396380 | 2.464887  |
| H  | -1.718501 | 1.818870  | 0.002596  |
| H  | -0.263572 | 2.333335  | 0.888296  |
| H  | -0.267724 | 2.331707  | -0.891110 |
| H  | -1.718136 | -0.911216 | -1.574845 |
| H  | -0.266596 | -0.394789 | -2.464958 |
| H  | -0.263678 | -1.936279 | -1.576134 |

---
